# Supplementary material for: Association between Admission Hyperglycemia and Culprit Lesion Characteristics in Nondiabetic Patients with Acute Myocardial Infarction: An Intravascular Optical Coherence Tomography Study
Source: Hindawi journal article supplement (doi:10.1155/2020/1763567), 2020-06-22
Supplement: f1 [file 1763567.f1.pdf]

## SUPPLEMENTAL MATERIAL

Table S1 Baseline characteristics of the study population and excluded patients

|                                  | Included patients    | Excluded patients    | P value |
|----------------------------------|----------------------|----------------------|---------|
| Age, years                       | 59.3 ± 11.8          | 57.4 ± 11.5          | 0.114   |
| BMI, kg/m <sup>2</sup>           | 26.2 ± 3.5           | 26.1 ± 3.7           | 0.771   |
| Men                              | 139 (88.5)           | 227 (81.9)           | 0.070   |
| Smoking                          | 122 (77.7)           | 192 (69.3)           | 0.060   |
| Time from symptom onset, h       | 6.0 (2.9,13.8)       | 6.0 (2.9, 13.7)      | 0.553   |
| Hypertension                     | 102 (65.0)           | 162 (58.5)           | 0.184   |
| Dyslipidemia                     | 148 (94.3)           | 251 (90.6)           | 0.179   |
| Diabetes mellitus                | 47 (29.9)            | 82 (29.6)            | 0.942   |
| Prior PCI                        | 38 (24.2)            | 21 (7.6)             | <0.001  |
| ABG, mg/dL                       | 146.5 (126.2, 193.0) | 142.6 (125.3, 190.8) | 0.607   |
| HbA1c, %                         | 6.1 (5.7, 7.0)       | 5.9 (5.6, 7.0)       | 0.234   |
| A/C                              | 1.13 (1.01, 1.31)    | 1.15 (1.03, 1.32)    | 0.410   |
| cTnI                             | 3.7 ± 8.1            | 3.7 ± 8.4            | 0.950   |
| CK-MB                            | 65.8 ± 98.3          | 68.2 ± 103.6         | 0.807   |
| WBC count, 10 <sup>6</sup> /L    | 10.8 ± 3.3           | 10.6 ± 3.1           | 0.652   |
| Hemoglobin, g/L                  | 150.2 ± 15.5         | 147.7 ± 16.4         | 0.132   |
| TC, mg/dL                        | 160.5 ± 38.2         | 171.0 ± 40.2         | 0.008   |
| TG, mg/dL                        | 140.9 ± 103.8        | 153.0 ± 108.5        | 0.256   |
| HDL-C, mg/dL                     | 42.9 ± 10.4          | 42.3 ± 12.9          | 0.655   |
| LDL-C, mg/dL                     | 98.4 ± 33.5          | 108.5 ± 33.2         | 0.003   |
| Lp(a), mg/L                      | 148.6 (69.8, 258.3)  | 164.0 (73.0, 367.0)  | 0.196   |
| eGFR, mL/min/1.73 m <sup>2</sup> | 93.3 ± 31.9          | 96.3 ± 31.4          | 0.347   |
| Hs-CRP, mg/L                     | 4.78 (2.38, 9.49)    | 5.78 (2.61, 10.74)   | 0.495   |
| LVEF, %                          | 54.0 ± 6.3           | 55.0 ± 6.2           | 0.088   |

Data shown are number (%), median (25th, 75th percentiles), or mean ± SD. ABG, acute blood glucose; A/C, acute/chronic; BMI, body mass index; CK-MB, creatine kinase MB; cTnI, cardiac troponin I; eGFR, estimated glomerular filtration rate; HbA1c, glycosylated hemoglobin; HDL-C, high-density lipoprotein cholesterol; Hs-

CRP, high-sensitivity C-reactive protein; LDL-C, low-density lipoprotein cholesterol; LVEF, left ventricular ejection fraction; PCI, percutaneous coronary intervention; TC, total cholesterol; TG, triglyceride; WBC, white blood cell.

Table S2 Linear regression analysis between A/C and cTnI/CK-MB

|             | $\beta$ coefficients | 95% confidence interval | p     |
|-------------|----------------------|-------------------------|-------|
| For cTnI*   |                      |                         |       |
| A/C tertile | -0.76                | -2.26 to 0.740          | 0.319 |
| A/C level   | -0.61                | -4.30 to 3.07           | 0.744 |
| For CK-MB*  |                      |                         |       |
| A/C tertile | -8.647               | -36.72 to 9.43          | 0.346 |
| A/C level   | -7.16                | -51.38 to 37.06         | 0.750 |

\*Adjustment for time from symptom onset. A/C tertile was used as ordered categorical variable; A/C level was used as continuous variable. A/C, acute-to-chronic glycemia ratio.

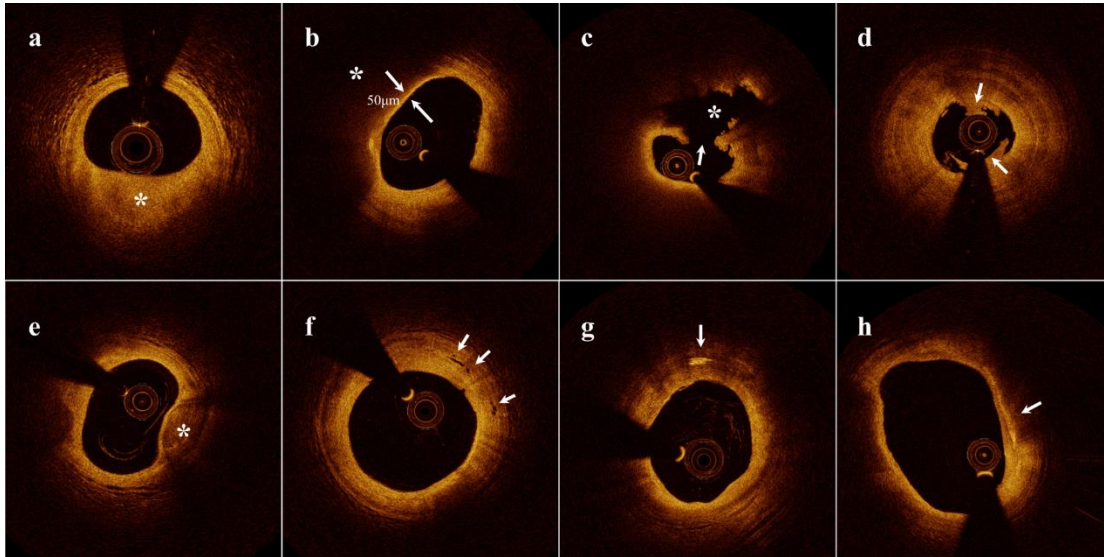

Figure S1. Representative cross-sectional optical coherence tomography images. **a** Fibrous plaque identified as a homogeneous, highly backscattering region (asterisk). **b** Lipid-rich plaque identified as a low-signal region with a diffuse border (asterisk) and thin-cap fibroatheroma with fibrous-cap thickness of 50µm. **c** Plaque rupture identified by disruption of the fibrous cap (arrow) and cavity formation (asterisk). **d** Plaque erosion identified by the presence of attached thrombus (arrow) overlying an intact plaque. **e** Calcification identified by the presence of a well-delineated, low-backscattering heterogeneous region (asterisk). **f** Microvessels defined as tubule luminal structures that do not generate a signal, with no connection to the vessel lumen (arrow). **g** Cholesterol crystal (arrow) identified by linear, highly backscattering structures without remarkable backward shadowing. **h** Macrophage infiltration (arrow) defined as a signal-rich, distinct, or confluent punctate region of higher intensity than background speckle noise that generates remarkable backward shadowing. Reprinted with permission from Sheng et al. (ref 18)
